# Supplementary material for: Structural and thermoelectric properties of Mn(Si 1− x Al x ) 1.75 : a commensurate phase mixture approximation
Source: Royal Society of Chemistry journal article supplement (doi:10.1039/d5ma00500k), 2025-11-25
Supplement: d5ma00500k1.pdf [file d5ma00500k1.pdf]

## **Supplementary Information**

### **Structural and Thermoelectric Properties of $\text{Mn}(\text{Si}_{1-x}\text{Al}_x)_{1.75}$ : A Commensurate Phase Mixture Approximation**

Panagiotis Mangelis,<sup>a</sup> Panagiotis S. Ioannou,<sup>a</sup> Anne-Karin Søiland<sup>b</sup> and Theodora Kyratsi<sup>a</sup>

<sup>a</sup> Department of Mechanical and Manufacturing Engineering, University of Cyprus, 1678  
Nicosia, Cyprus

<sup>b</sup> ReSiTec AS, Setesdalsveien 110, 4617 Kristiansand, Norway

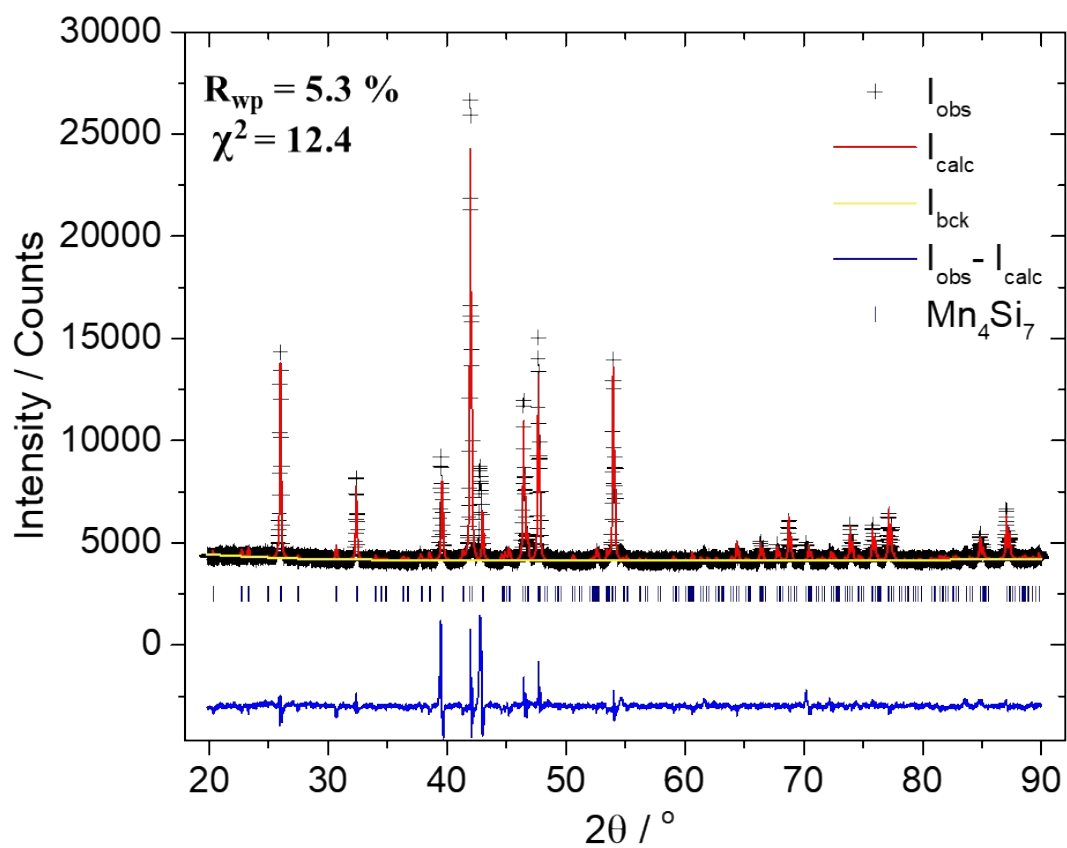

Figure S1 Powder XRD Rietveld refinement profile of  $MnSi_{1.75}$  for the single phase  $P4c2$   $Mn_4Si_7$  model. Final observed (black crosses), calculated (red solid line), calculated background (yellow line) and difference (blue line).

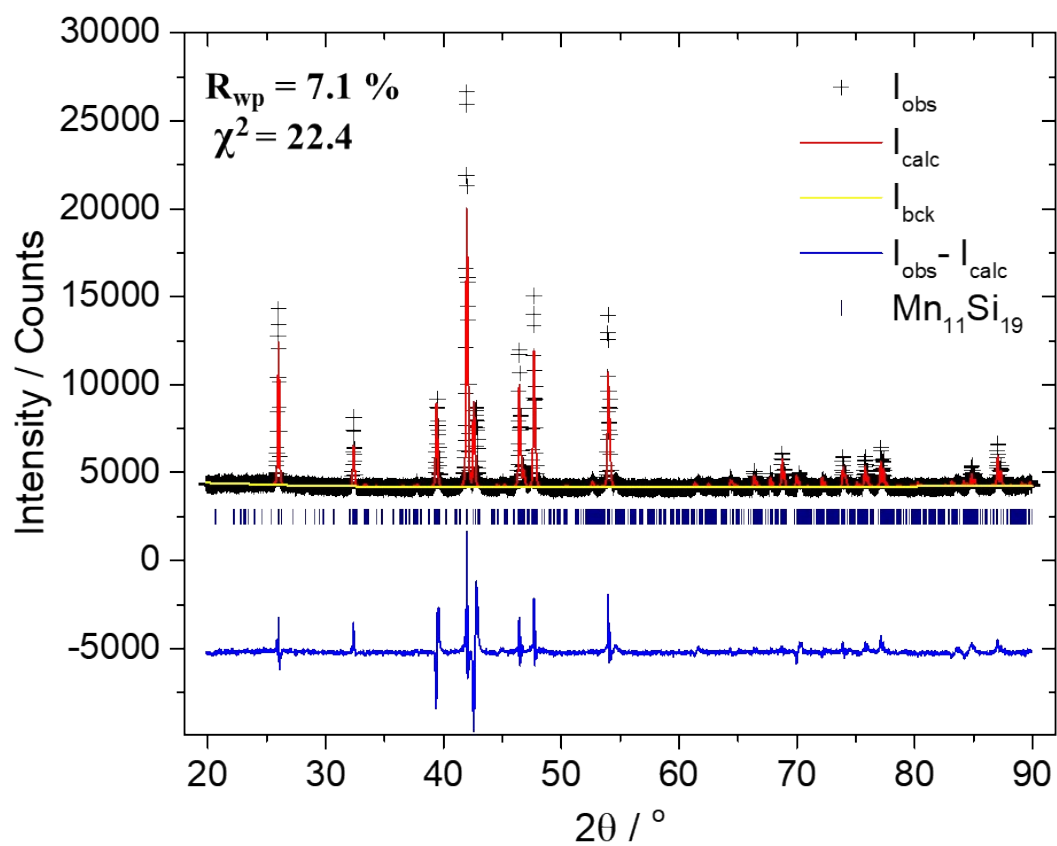

Figure S2 Powder XRD Rietveld refinement profile of  $MnSi_{1.75}$  for the single phase  $P4n2$   $Mn_{11}Si_{19}$  model. Final observed (black crosses), calculated (red solid line), calculated background (yellow line) and difference (blue line).

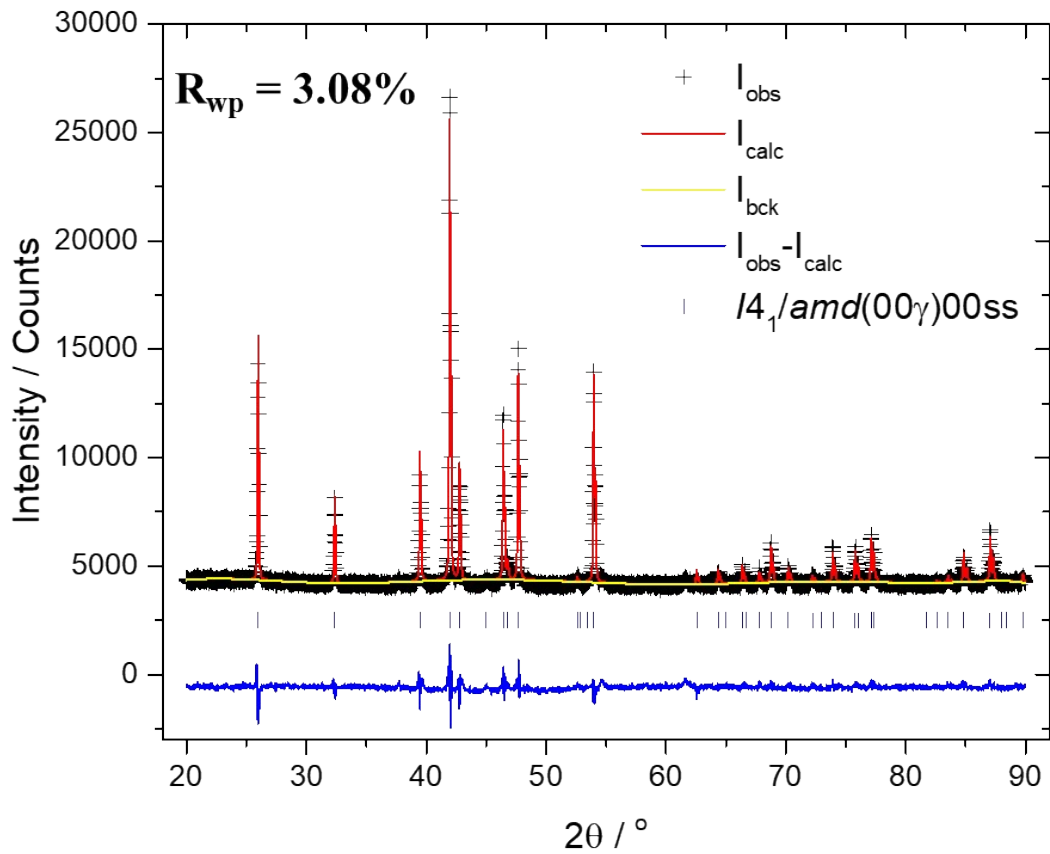

Figure S3 Le Bail refinement profile of MnSi<sub>1.75</sub> for the incommensurate structural model with the (3+1)D superspace group  $I4_1/amd(00\gamma)00ss$  ( $gof = 2.04$ ). Final observed (black crosses), calculated (red solid line), calculated background (yellow line) and difference (blue line).

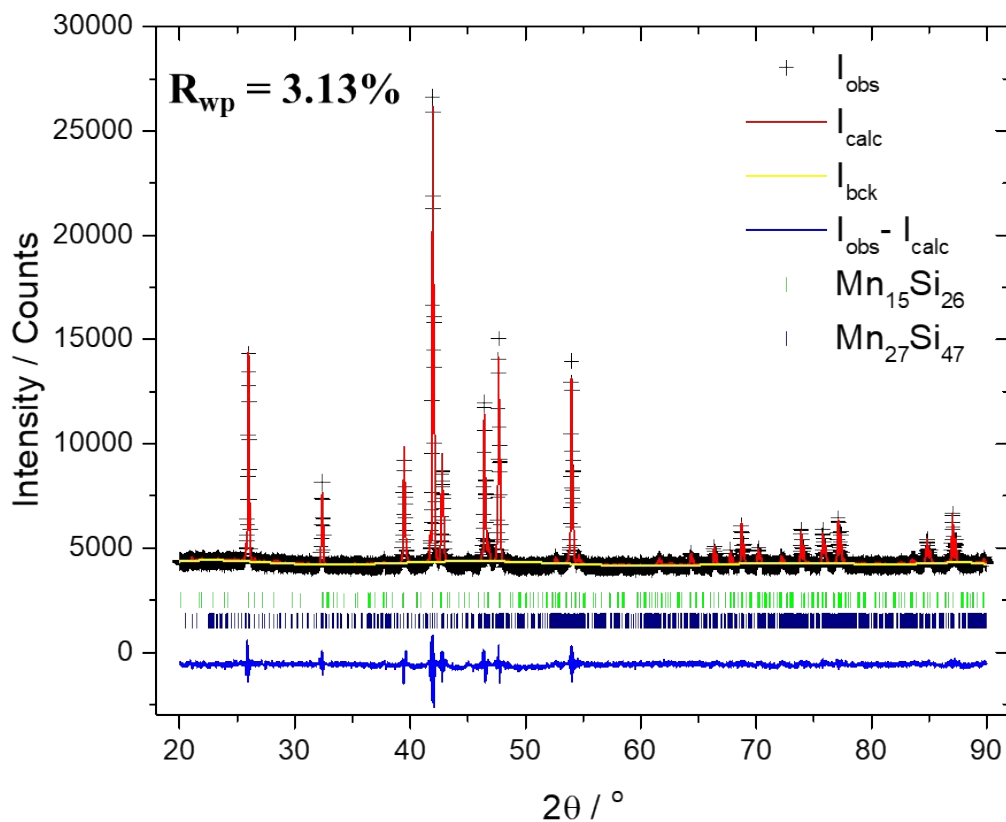

Figure S4 Le Bail refinement profile of  $\text{MnSi}_{1.75}$  for the commensurate phase mixture model of  $P\bar{4}n2$   $\text{Mn}_{27}\text{Si}_{47}$  and  $\bar{P}42d$   $\text{Mn}_{15}\text{Si}_{26}$  ( $gof = 2.07$ ). Final observed (black crosses), calculated (red solid line), calculated background (yellow line) and difference (blue line).

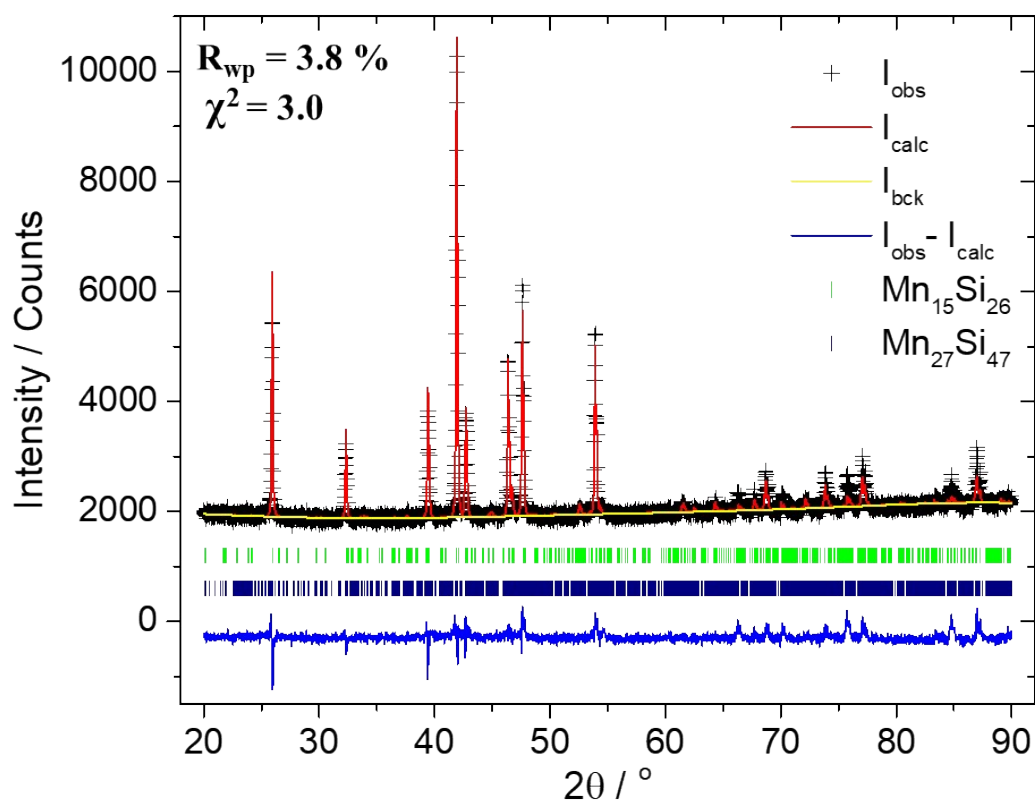

Figure S5 Powder XRD Rietveld refinement profile of  $Mn(Si_{0.98}Al_{0.02})_{1.75}$  for the phase mixture structural model. Final observed (black crosses), calculated (red solid line), calculated background (yellow line) and difference (blue line). Reflection positions for the two phases,  $Mn_{15}Si_{26}$  and  $Mn_{27}Si_{47}$ , are marked with green and navy color respectively.

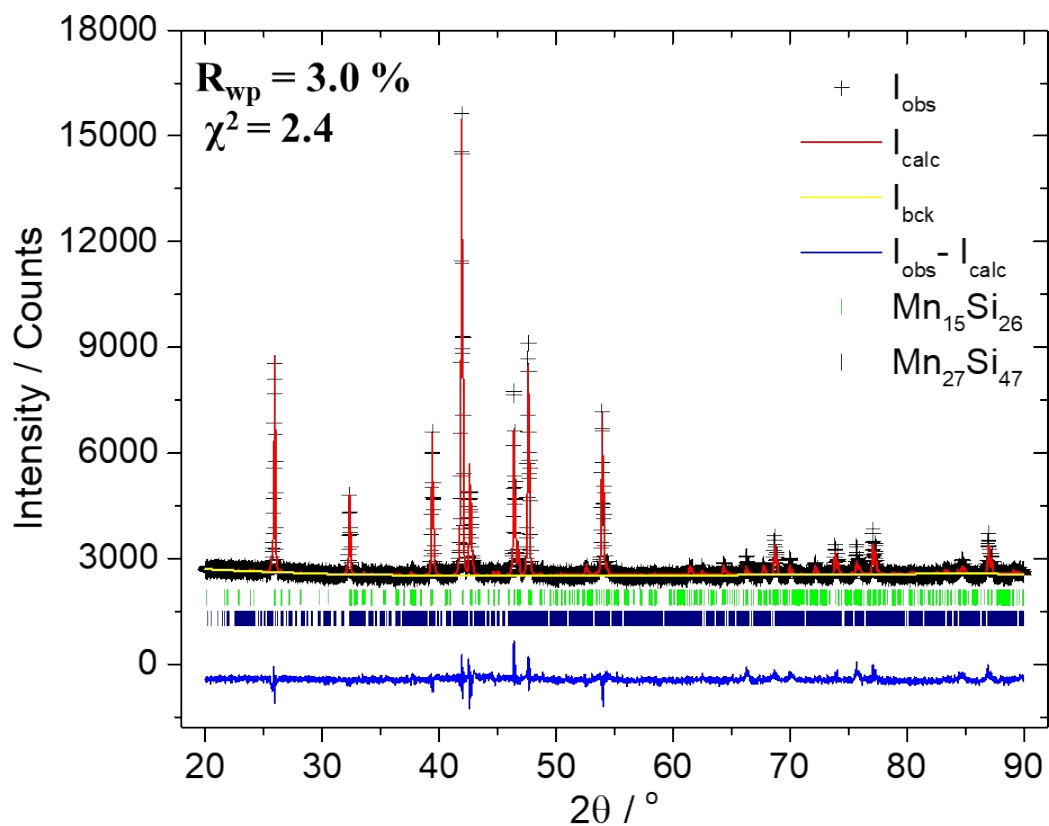

Figure S6 Powder XRD Rietveld refinement profile of  $Mn(Si_{0.975}Al_{0.025})_{1.75}$  for the phase mixture structural model. Final observed (black crosses), calculated (red solid line), calculated background (yellow line) and difference (blue line). Reflection positions for the two phases,  $Mn_{15}Si_{26}$  and  $Mn_{27}Si_{47}$ , are marked with green and navy color respectively.

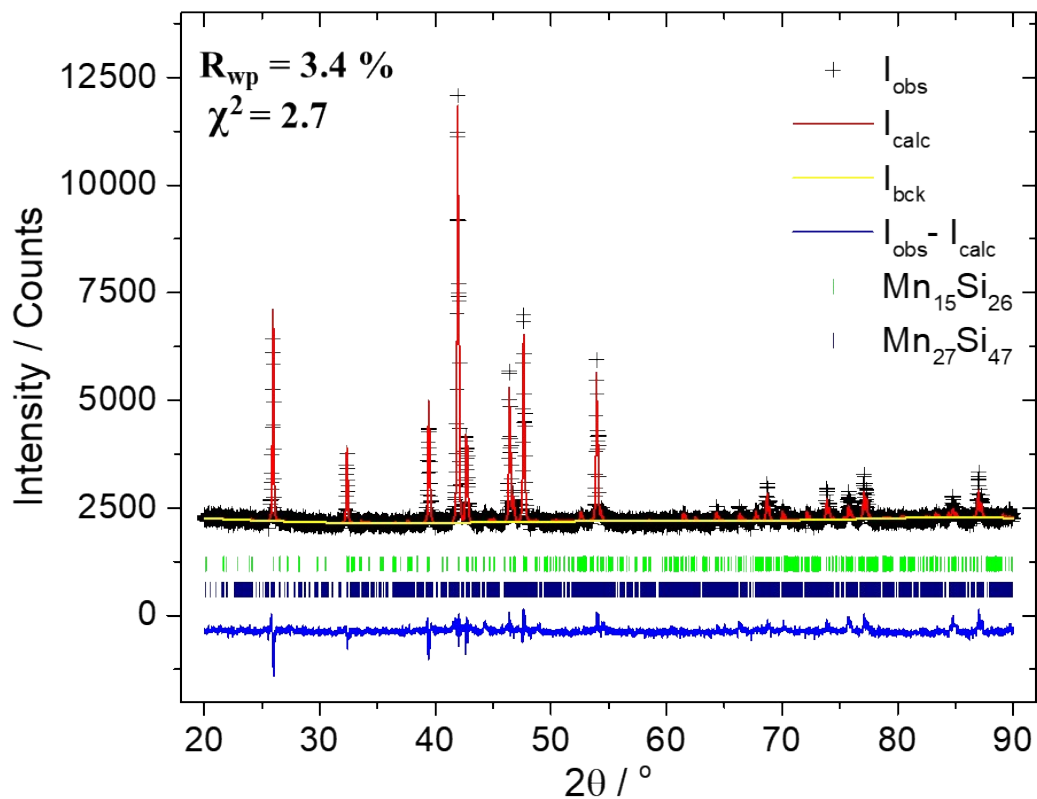

Figure S7 Powder XRD Rietveld refinement profile of  $Mn(Si_{0.97}Al_{0.03})_{1.75}$  for the phase mixture structural model. Final observed (black crosses), calculated (red solid line), calculated background (yellow line) and difference (blue line). Reflection positions for the two phases,  $Mn_{15}Si_{26}$  and  $Mn_{27}Si_{47}$ , are marked with green and navy color respectively.



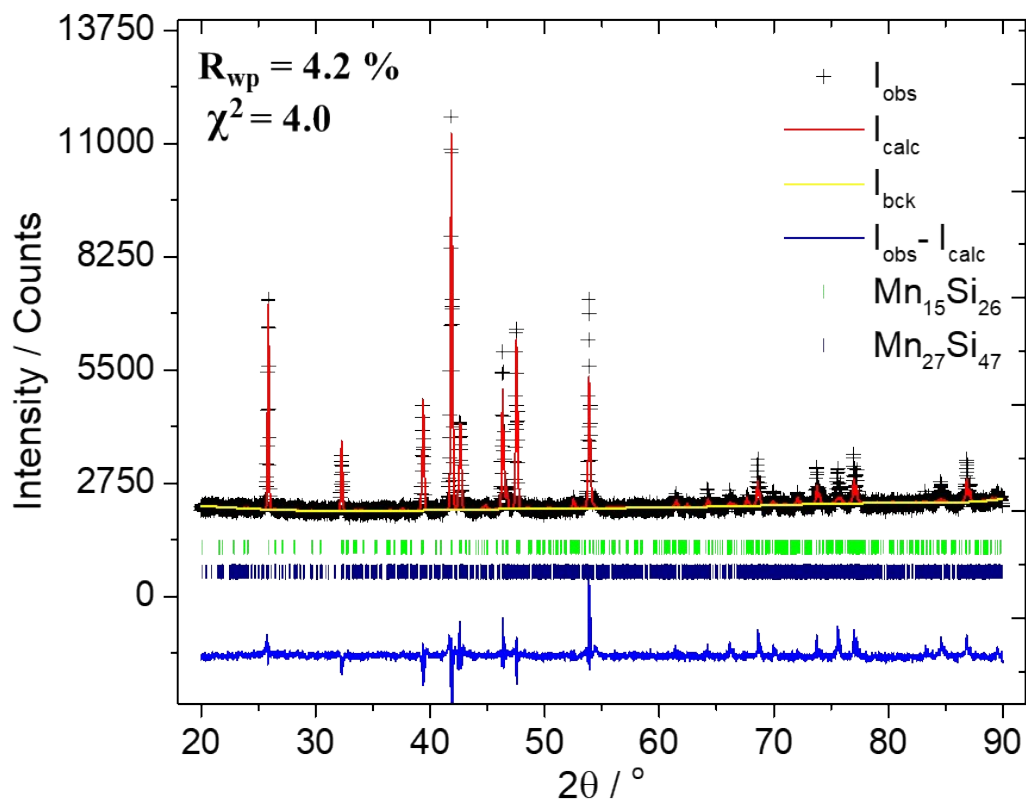

Figure S8 Powder XRD Rietveld refinement profile of  $Mn(Si_{0.96}Al_{0.04})_{1.75}$  for the phase mixture structural model. Final observed (black crosses), calculated (red solid line), calculated background (yellow line) and difference (blue line). Reflection positions for the two phases,  $Mn_{15}Si_{26}$  and  $Mn_{27}Si_{47}$ , are marked with green and navy color respectively.

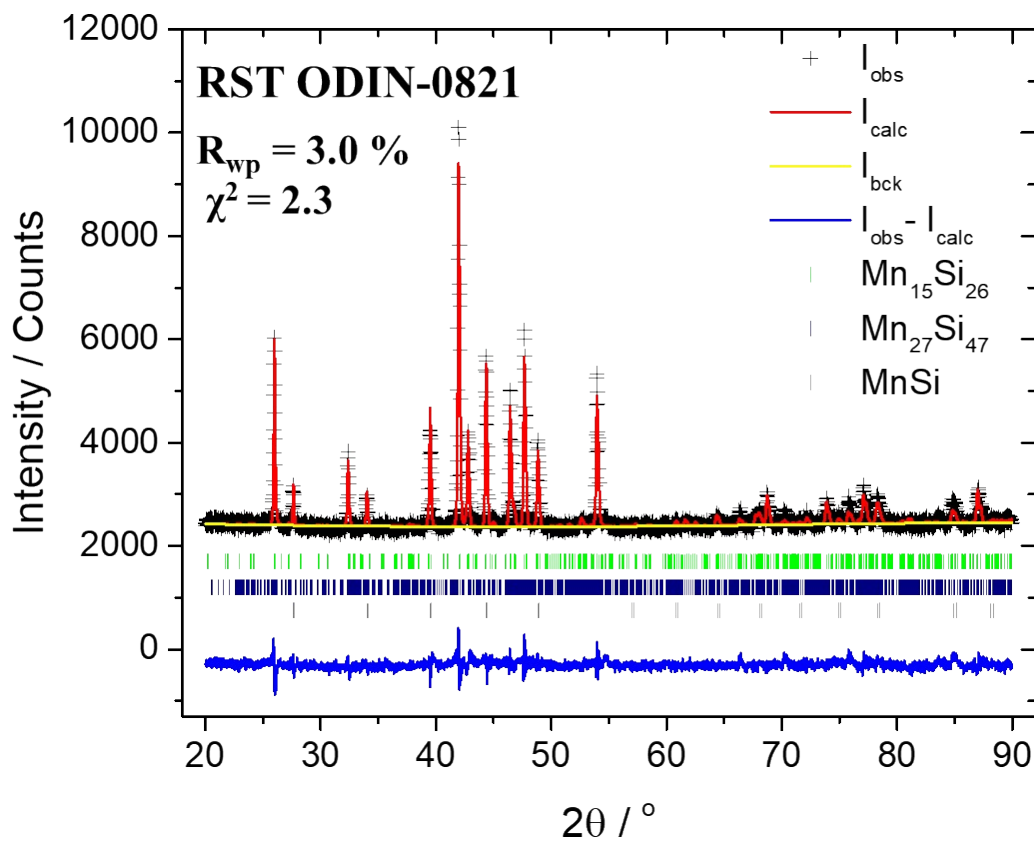

Figure S9 Powder XRD Rietveld refinement profile of  $\text{Mn}(\text{Si}_{0.975}\text{Al}_{0.025})_{1.75}$  based on RST ODIN-0821 silicon kerf for the phase mixture structural model. Final observed (black crosses), calculated (red solid line), calculated background (yellow line) and difference (blue line). Reflection positions for the  $\text{Mn}_{15}\text{Si}_{26}$ ,  $\text{Mn}_{27}\text{Si}_{47}$  and  $\text{MnSi}$  phases are marked with green, navy and gray color respectively.

Table S1 Refined lattice parameters and modulation vector extracted from Le Bail refinement of incommensurate model with the (3+1)D superspace group  $I4_1/amd(00\gamma)00ss$ .

| $\gamma$ | $a / \text{\AA}$ | $c_{\text{Mn}} / \text{\AA}$ | $c_{\text{Si}} / \text{\AA}$ |
|----------|------------------|------------------------------|------------------------------|
| 1.739    | 5.52519(6)       | 4.36513(7)                   | 2.51014(7)                   |

Table S2 Densities of fabricated  $\text{Mn}(\text{Si}_{1-x}\text{Al}_x)_{1.75}$  ( $0 \leq x \leq 0.04$ ) pellets: experimental and theoretical values calculated by Rietveld analysis.

| x                    | Experimental / $\text{g cm}^{-3}$ | Theoretical / $\text{g cm}^{-3}$ |
|----------------------|-----------------------------------|----------------------------------|
| 0                    | 4.95                              | 5.17                             |
| 0.02                 | 4.98                              | 5.16                             |
| 0.025                | 4.95                              | 5.15                             |
| 0.03                 | 5.03                              | 5.16                             |
| 0.04                 | 5.06                              | 5.15                             |
| 0.025, RST 1-2       | 5.15                              | 5.28                             |
| 0.025, RST ODIN-0821 | 5.13                              | 5.29                             |

Table S3 Estimations of VEC for the two Al-doped  $\text{Mn}_{27}\text{Si}_{47}$  ( $\gamma = 1.74$ ) and  $\text{Mn}_{15}\text{Si}_{26}$  ( $\gamma = 1.73$ ) in the phase mixture according to the formula:  $\text{VEC} = 7 + (4(1 - x) - 3x)\gamma$

| x     | $\text{Mn}_{27}\text{Si}_{47}$ | $\text{Mn}_{15}\text{Si}_{26}$ |
|-------|--------------------------------|--------------------------------|
| 0     | 13.96                          | 13.92                          |
| 0.02  | 13.7164                        | 13.6778                        |
| 0.025 | 13.6555                        | 13.61725                       |
| 0.03  | 13.5946                        | 13.5567                        |
| 0.04  | 13.4728                        | 13.4356                        |

Table S4 Refined parameters from Rietveld analysis of powder XRD data for  $\text{Mn}(\text{Si}_{0.975}\text{Al}_{0.025})_{1.75}$  phases based on the two Si kerfs, RST ODIN-0821 and RST 1-2.

| Phase Mixture | $\text{Mn}_{27}\text{Si}_{47}$ |                  |                  | $\text{Mn}_{15}\text{Si}_{26}$ |                  |                  | MnSi    |
|---------------|--------------------------------|------------------|------------------|--------------------------------|------------------|------------------|---------|
| Si-kerf       | wt. %                          | $a / \text{\AA}$ | $c / \text{\AA}$ | wt. %                          | $a / \text{\AA}$ | $c / \text{\AA}$ | wt. %   |
| RST 1-2       | 50.8(4)                        | 5.5315(3)        | 117.97(1)        | 29.3(4)                        | 5.5286(2)        | 65.530(3)        | 19.9(1) |
| RST ODIN-0821 | 52.5(4)                        | 5.5301(2)        | 117.987(6)       | 27.9(5)                        | 5.5305(4)        | 65.525(7)        | 19.6(2) |
